# Supplementary material for: Selective enrichment of sialylated glycopeptides with a d-allose@SiO2 matrix
Source: Royal Society of Chemistry journal article supplement (doi:10.1039/c8ra07192f), 2018-01-01
Supplement: c8ra07192f2.xlsx [file c8ra07192f2.xlsx]

## Sheet: Sheet1
Table S3 The identified glycopeptides from HeLa cell lysate with ABS matrix
Protein No.	Reference	Sequence	Glycosylation sites No.	Glycosylation sites	Charge	m/z	MH+	Ions-score
1	sp|Q08209|Serine/threonine-protein phosphatase 2B catalytic subunit alpha isoform;Serine/threonine-protein phosphatase;Serine/threonine-protein phosphatase	ALTSETNGTDSNGSNSSNIQ	1	N508	2	999.922	1997.84	114.99
2	sp|A2BF26|HLA class I histocompatibility antigen, Cw-2 alpha chain;HLA class I histocompatibility antigen, Cw-8 alpha chain;HLA class I histocompatibility antigen, Cw-12 alpha chain;HLA class I histocompatibility antigen, Cw-5 alpha chain;HLA class I histocompatibility antigen, B-15 alpha chain;HLA class I histocompatibility antigen, B-18 alpha chain;HLA class I histocompatibility antigen, B-39 a…	GYYNQSEAGSHTLQR	2	N110	2	856.387	1710.77	72.315
3	sp|Q14508|WAP four-disulfide core domain protein 2	TGVCPELQADQNCTQECVSDSECADNLK	3	N44	2	808.081	1614.16	106.42
4	sp|P19022|Cadherin-2	VCQCDSNTDVDR	4	N706	4	901.325	3601.3	82.849
5	sp|P29323|Ephrin type-B receptor 2	AGFEAVENGTVCR	5	N265	2	705.82	1409.64	138.19
6	sp|P08174-7|Complement decay-accelerating factor	GSQWSDIEEFCNR	6	N95	2	543.56	1085.12	98.592
7	sp|O00148|ATP-dependent RNA helicase DDX39A	AEQDVENDLLDYDEEEEPQAPQESTPAPPKK	7	N8	3	1185.53	3553.6	206.49
8	sp|Q9H0X4|Protein ITFG3	YKPDTLAVAVENGTGTDR	8	N389	3	636.65	1906.95	62.57
9	sp|P42892|Endothelin-converting enzyme 1	LGGWNITGPWAK	9	N210	2	656.925	1311.85	75.143
		DYYLNKTENEK	10	N270	3	709.328	2124.98	113.69
10	sp|Q8WU90|Zinc finger CCCH domain-containing protein 15	EVFEFRPELVNDDDEEADDTR	11	N303	2	847.702	1693.4	107.65
11	sp|B4DRT2|28S ribosomal protein S27, mitochondrial	ALTSADGASEEQSQNDEDNQGSEK	12	N317	3	837.679	2510.04	150.94
12	sp|B4DT68|-	MDSNYQQSSAGQPINAK	13	N15	3	633.607	1897.82	51.03
13	sp|P50579|Methionine aminopeptidase 2;Methionine aminopeptidase;Methionine aminopeptidase;Methionine aminopeptidase;Methionine aminopeptidase;Methionine aminopeptidase	AGVEEVAASGSHLNGDLDPDDREEGAASTAEEAAK	14	N15	3	1171.19	3510.57	128.71
14	sp|O15371|Eukaryotic translation initiation factor 3 subunit D	DNSDFDLLTVSETANEPPQDEGNSFNSPR	15	N296	3	1066.13	3195.4	47.919
15	sp|P48960|EGF-like module-containing mucin-like hormone receptor-like 2;CD97 antigen;CD97 antigen subunit alpha;CD97 antigen subunit beta	WCPQNSSCVNATACR	16	N33	3	867.359	2599.08	109.28
		TFKNESENTCQDVDECQQNPR	17	N108	2	1061.96	2121.93	64.394
16	sp|M0R0K5|EGF-like module-containing mucin-like hormone receptor-like 2	WCPQDSSCVNATACR	18	N41	3	906.859	2717.58	96.773
17	sp|P11279|Lysosome-associated membrane glycoprotein 1	SGPKNMTFDLPSDATVVLNR	19	N62	2	722.025	1442.05	154.75
		SSCGKENTSDPSLVIAFGR	20	N84	3	1013.48	3037.44	110.35
18	sp|F6S8M0|N-acetylglucosamine-6-sulfatase	TPMTNSSIQFLDNAFR	21	N311	2	929.936	1857.87	113.62
29	sp|E9PGN7|Plasma protease C1 inhibitor	DTFVNASR	22	N272	2	455.717	909.434	103.58
20	sp|P13473-3|Lysosome-associated membrane glycoprotein 2	TVTISDHGTVTYNGSICGDDQNGPK	23	N75	2	879.729	1757.46	140.49
		YETTNKTYK	24	N58	2	489.732	977.463	98.337
21	sp|P39023|60S ribosomal protein L3	NNASTDYDLSDK	25	N301	2	672.776	1343.55	188.13
22	sp|P54289|Voltage-dependent calcium channel subunit alpha-2/delta-1;Voltage-dependent calcium channel subunit alpha-2-1;Voltage-dependent calcium channel subunit delta-1	SFSGVLDCGNCSR	26	N998	3	730.301	2187.9	116.13
23	sp|B7ZKS7|Ubiquitin carboxyl-terminal hydrolase 48	QLALEQLDEQDGDAEQSNGK	27	N620	3	730.333	2188	34.221
24	sp|Q8IXK0-2|-	MTSGNGNSASSIAGTAPQNGENK	28	N5	2	752.313	1502.63	244.27
25	sp|Q05682|Caldesmon	NDDDEEEAAR	29	N30	2	582.718	1163.44	210.98
26	sp|P25311|Zinc-alpha-2-glycoprotein	DIVEYYNDSNGSHVLQGR	30	N109	2	1034.47	2066.93	171.06
27	sp|C9JF17|Apolipoprotein D	ADGTVNQIEGEATPVNLTEPAKLEVK	31	N126	3	1128.06	3381.17	186.87
28	sp|P07339|Cathepsin D;Cathepsin D light chain;Cathepsin D heavy chain	YYKGSLSYLNVTR	32	N263	2	413.563	825.126	83.182
		GSLSYLNVTRK	33	N263	2	719.37	1436.74	53.037
29	sp|Q96NT5|Proton-coupled folate transporter	FSADLGYNGTR	34	N58	3	601.278	1800.83	97.797
30	sp|C9JV77|Alpha-2-HS-glycoprotein;Alpha-2-HS-glycoprotein chain A;Alpha-2-HS-glycoprotein chain B	AALAAFNAQNNGSNFQLEEISR	35	N176	2	789.384	1576.77	80.245
		VCQDCPLLAPLNDTR	36	N157	2	886.919	1771.84	142.54
31	sp|Q8NBJ4|Golgi membrane protein 1	AVLVNNITTGER	37	N108	3	644.841	1931.52	107.46
32	sp|CON__P12763|-	LCPDCPLLAPLNDSR	38	N156	3	581.28	1740.84	188.44
		DDDIAALVVDNGSGMCK	39	N12	2	511.929	1021.86	75.819
		FNNSTVSSER	40	N188	2	911.895	1821.79	44.6
		DTDMDGVGDQCDNCPLEHNPDQLDSDSDR	41	N841	3	571.26	1710.78	143.05
		FDPVTGEVNSTYPR	42	N219	2	1113.09	2224.17	112.71
		CTEGFNATR	43	N33	2	791.873	1581.75	55.66
33	sp|H7BYZ3|Calcineurin subunit B type 1	VIDIFDTDGNGEVDFK	44	N57	2	892.915	1783.83	85.522
34	sp|J3KQ67|Claudin domain-containing protein 1	SPVQENSSDLNK	45	N65	2	659.81	1317.62	91.855
35	sp|P26006-1|Integrin alpha-3;Integrin alpha-3 heavy chain;Integrin alpha-3 light chain	ELAVPDGYTNR	46	N86	3	618.299	1851.9	61.87
36	sp|Q70EL2|Ubiquitin carboxyl-terminal hydrolase 45;Ubiquitin carboxyl-terminal hydrolase	ENQPLNISNNLCFLEGKHLR	47	N582	3	800.394	2398.18	114.31
37	sp|Q6PKG0|La-related protein 1	SDESGEEKNGDEDCQR	48	N233	2	619.562	1237.12	166.9
38	sp|P17301|Integrin alpha-2	YFFNVSDEAALLEK	49	N343	2	823.901	1645.8	62.162
39	sp|P16070|CD44 antigen	AFNSTLPTMAQMEK	50	N57	2	793.365	1584.73	115.14
40	sp|P11940|Polyadenylate-binding protein 1;Polyadenylate-binding protein 3	NLDDGIDDER	51	N300	3	581.747	1742.24	40.085
41	sp|Q13342|Nuclear body protein SP140	MAQQGQQGQMASGDSNLNFR	52	N16	2	743.972	1485.94	130.47
42	sp|P19440|Gamma-glutamyltranspeptidase 1;Gamma-glutamyltranspeptidase 1 heavy chain;Gamma-glutamyltranspeptidase 1 light chain	LAFATMFNSSEQSQK	53	N120	3	853.391	2557.17	51.819
43	sp|P78527|DNA-dependent protein kinase catalytic subunit	LTPLPEDNSMNVDQDGDPSDR	54	N3204	2	778.001	1554	144.72
44	sp|E9PEA4|Uromodulin;Uromodulin, secreted form	FALLMTNCYATPSSNATDPLK	55	N546	2	1166.55	2331.09	89.507
		QDFNITDISLLEHR	56	N355	3	851.426	2551.28	184.22
45	sp|E9PR17|CD59 glycoprotein	TAVNCSSDFDACLITK	57	N43	2	601.603	1201.21	177.02
	sp|Q8NBI5|Solute carrier family 43 member 3	DLCGPDAGPIGNATGQADCK	58	N56	2	1009.43	2016.87	76.064
46	sp|E9PSI1|Transmembrane 9 superfamily member 1	IIFANVSVR	59	N387	3	510.298	1527.89	67.11
		YNLDEETTSAGSGDDFDQGDNGWK	60	N497	2	874.684	1747.37	138.97
47	sp|F5GWY5|Podocalyxin	QLVLNLTGNTLCAGGASDEK	61	N362	3	1031.51	3091.53	118.37
48	sp|Q13740|CD166 antigen	TVNSLNVSAISIPEHDEADEISDENREK	62	N518	3	811.072	2430.22	58.159
		IIISPEENVTLTCTAENQLER	63	N480	2	754.66	1507.32	110.8
		LGDCISEDSYPDGNITWYR	64	N167	3	906.859	2717.58	201.48
49	sp|F5H025|Neural cell adhesion molecule L1	DLQANDTGR	65	N492	2	495.728	989.456	145.99
		VPGNQTSTTLK	66	N673	2	856.387	1710.77	160.48
50	sp|P08195-4|4F2 cell-surface antigen heavy chain	DASSFLAEWQNITK	67	N396	2	781.878	1561.76	31.111
		SLVTQYLNATGNR	68	N455				121.24
		FQLLNFSSSELK	69	N101	2	805.888	1609.78	209.45
51	sp|Q9BY67-3|Cell adhesion molecule 1	VSLTNVSISDEGR	70	N113	3	689.346	2065.04	84.759
52	sp|Q9NXZ1|Sarcoma antigen 1	MQASPLQTSQPTPPEELHAAAYVFTNDGQQMR	71	N26	2	1207.54	2413.09	123.72
53	sp|P14384|Carboxypeptidase M	NFPDAFEYNNVSR	72	N164	3	787.35	2359.05	226.65
54	sp|F8W7I2|Prostaglandin-H2 D-isomerase	SVVAPATDGGLNLTSTFLR	73	N78	2	640.674	1279.35	126.12
		WFSAGLASNSSWLR	74	N51	2	791.886	1581.77	141.31
55	sp|Q567U6|Coiled-coil domain-containing protein 93	EDEEQNVK	75	N24	2	496.706	991.413	65.225
56	sp|Q9Y2H0|Disks large-associated protein 4	DTDSDTQDANDSSCK	76	N722	2	830.3	1658.6	78.505
57	sp|O95297|Myelin protein zero-like protein 1	EIFVANGTQGK	77	N50	2	582.798	1163.6	128.59
58	sp|Q9UIG8|Solute carrier organic anion transporter family member 3A1	DVCAANGSGGDEGPDPDLICR	78	N153	2	1088.45	2174.9	185.28
59	sp|P07910|Heterogeneous nuclear ribonucleoproteins C1/C2	EAEEGEDDRDSANGEDDS	79	N301	2	970.841	1939.68	160.84
60	sp|G3XAI2|Laminin subunit beta-1	LSDTTSQSNSTAK	80	N1303	2	670.812	1339.62	80.96
61	sp|H0Y449|Nuclease-sensitive element-binding protein 1	AADPPAENSSAPEAEQGGAE	81	N362	3	949.898	2846.69	164.81
		EDGNEEDKENQGDETQGQQPPQR	82	N310	2	877.034	1752.07	49.525
62	sp|Q29983|MHC class I polypeptide-related sequence A	SEASEGNITVTCR	83	N220	2	712.82	1423.64	90.385
63	sp|Q96AY3|Peptidyl-prolyl cis-trans isomerase FKBP10	TLSRPSETCNETTK	84	N393	2	812.878	1623.76	45.347
64	sp|P10909-2|Clusterin;Clusterin beta chain;Clusterin alpha chain;Clusterin	LANLTQGEDQYYLR	85	N426	4	842.912	3367.65	61.477
65	sp|P49321-3|Nuclear autoantigenic sperm protein	QEPEVNGGSGDAVPSGNEVSENMEEEAENQAESR	86	N744	2	894.875	1787.75	107.74
66	sp|P08047|Transcription factor Sp1	GVGGNNGGNGNGGGAFSQAR	87	N24	3	876.364	2626.09	59.862
67	sp|Q9UJ98|Cohesin subunit SA-3	VALQLSVHQDNNQRQYEAERNK	88	N269	2	882.091	1762.18	63.727
68	sp|P14868|Aspartate--tRNA ligase, cytoplasmic	EAGVEMGDEDDLSTPNEK	89	N372	2	976.899	1951.8	63.29
69	sp|H7BZJ3|Thioredoxin	SDVLELTDDNFESR	90	N10	2	820.868	1639.74	143.46
70	sp|H7C199|-	TQTQLIFLMMNQVEGQQK	91	N54	2	1087.01	2172.01	177.6
71	sp|Q9UPR0|Inactive phospholipase C-like protein 2	MGKENMEQPNNVPVK	92	N605	3	867.882	2600.65	73.91
72	sp|P25445|Tumor necrosis factor receptor superfamily member 6	LCDEGHGLEVEINCTR	93	N118	2	634.949	1267.9	62.193
73	sp5|P356135|Basigin	ITDSEDKALMNGSESR	94	N268	2	877.399	1752.8	111.66
		ILLTCSLNDSATEVTGHR	95	N160	2	994.491	1986.98	119.76
74	sp|Q5QJE6|Deoxynucleotidyltransferase terminal-interacting protein 2	DLDEDANGITDEGK	96	N304	4	746.818	2983.27	77.42
75	sp|J9JID7|Lamin-B2	ENENGEEEEEEAEFGEEDLFHQQGDPR	97	N588	3	799.071	2394.21	55.988
76	sp|Q96G46|tRNA-dihydrouridine(47) synthase [NAD(P)(+)]-like	AEGTAEAPLENGGGGDSGAGALER	98	N12	3	743.668	2228	48.968
77	sp|O15031|Plexin-B2	CVYEALCNTTSECPPPVITR	99	N795	2	790.025	1578.05	125.61
		SCVAVTSAQPQNMSR	100	N528	3	826.872	2477.62	51.348
78	sp|O15118|Niemann-Pick C1 protein	QSQFLNVTATEDYVDPVTNQTK	101	N122	3	834.062	2499.19	98.156
79	sp|O75376|Nuclear receptor corepressor 1	QEQIDLECRSSTSPCGTSKSPNR	102	N1001	2	880.066	1758.13	149.73
80	sp|O75629|Protein CREG1	IVTPEEYYNVTVQ	103	N216	3	778.38	2332.14	199.8
81	sp|O75976|Carboxypeptidase D	LLNTTDVYLLPSLNPDGFER	104	N172	2	760.058	1518.12	90.697
82	sp|O76094|Signal recognition particle 72 kDa protein	NSQDDYDEER	105	N138	2	636.237	1270.47	60.436
83	sp|P01009|Alpha-1-antitrypsin;Short peptide from AAT	YLGNATAIFFLPDEGK	106	N271	2	878.943	1755.89	59.046
84	sp|P01042|Kininogen-1;Kininogen-1 heavy chain;T-kinin;Bradykinin;Lysyl-bradykinin;Kininogen-1 light chain;Low molecular weight growth-promoting factor	ITYSIVQTNCSK	107	N205	2	707.848	1413.7	316.39
		LNAENNATFYFK	108	N293	2	716.841	1431.68	205.78
85	sp|P02750|Leucine-rich alpha-2-glycoprotein	MFSQNDTR	109	N325	3	508.211	1521.63	96.464
86	sp|P02760|Protein AMBP;Alpha-1-microglobulin;Inter-alpha-trypsin inhibitor light chain;Trypstatin	YFYNGTSMACETFQYGGCMGNGNNFVTEK	110	N250	2	1127.78	2253.55	69.261
87	sp|P02763|Alpha-1-acid glycoprotein 1	QDQCIYNTTYLNVQR	111	N93	2	958.944	1915.89	73.466
88	sp|P02786|Transferrin receptor protein 1;Transferrin receptor protein 1, serum form	KDFEDLYTPVNGSIVIVR	112	N251	2	1033.54	2065.09	144.3
		LAVDEEENADNNTK	113	N50	2	781.844	1561.69	84.718
89	sp|P02790|Hemopexin	ALPQPQNVTSLLGCTH	114	N453	2	868.935	1735.87	89.629
		SWPAVGNCSSALR	115	N187	3	703.33	2106.99	113.69
90	sp|P04083|Annexin A1	GDRSEDFGVNEDLADSDAR	116	N195	2	690.295	1378.59	102.64
91	sp|P05186|Alkaline phosphatase, tissue-nonspecific isozyme	NKTDVEYESDEK	117	N230	3	729.318	2184.95	227.4
92	sp|P05556-3|Integrin beta-1	CHEGNGTFECGACR	118	N481	3	552.538	1654.61	171.32
		DTCTQECSYFNITK	119	N669	3	589.912	1766.73	65.171
		NPCTSEQNCTSPFSYK	120	N205	3	640.929	1919.79	106.57
		LRNPCTSEQNCTSPFSYK	121	N212	2	730.658	1459.32	110.77
		NGVNGTGENGRK	122	N403	3	603.273	1806.82	114.96
		SCGECIQAGPNCGWCTNSTFLQEGMPTSAR	123	N44	2	1131.79	2261.59	135.09
93	sp|P08621|U1 small nuclear ribonucleoprotein 70 kDa	GGGGGQDNGLEGLGNDSR	124	N401	2	831.354	1660.71	83.499
94	sp|P08648|Integrin alpha-5;Integrin alpha-5 heavy chain;Integrin alpha-5 light chain	DLDGNGYPDLIVGSFGVDK	125	N469	3	991.473	2971.42	99.603
		GNLTYGYVTILNGSDIR	126	N297	3	619.979	1856.94	125.03
		HPGNFSSLSCDYFAVNQSR	127	N712	2	729.985	1457.97	77.776
		NLNNSQSDVVSFR	128	N773	3	741.347	2221.04	147.06
		TEKEPLSDPVGTCYLSTDNFTR	129	N182	2	844.392	1686.78	66.246
95	sp|P09661|U2 small nuclear ribonucleoprotein A'	RSGPTDDGEEEMEEDTVTNGS	130	N253	2	1128.44	2254.88	60.918
96	sp|P10253|Lysosomal alpha-glucosidase;76 kDa lysosomal alpha-glucosidase;70 kDa lysosomal alpha-glucosidase	GVFITNETGQPLIGK	131	N470	2	787.925	1573.85	54.259
97	sp|P11717|Cation-independent mannose-6-phosphate receptor	TEGENCTVFDSQAGFSFDLSPLTK	132	N626	3	1169.99	3506.97	56.482
		DAGVGFPEYQEEDNSTYNFR	133	N747	3	634.617	1900.85	92.679
		MSVINFECNKTAGNDGK	134	N435	2	736.671	1471.34	154.72
		SLLEFNTTVSCDQQGTNHR	135	N112	2	1393.15	2784.29	56.527
		TGPVVEDSGSLLLEYVNGSACTTSDGR	136	N871	3	946.407	2836.22	65.854
98	sp|P14324|Farnesyl pyrophosphate synthase	MNGDQNSDVYAQEK	137	N68	2	829.828	1657.66	48.76
99	sp|P15151|Poliovirus receptor	VEDEGNYTCLFVTFPQGSR	138	N120	2	1110.5	2219	66.387
100	sp|P19652|Alpha-1-acid glycoprotein 2	QNQCFYNSSYLNVQR	139	N93	2	961.429	1920.86	86.67
101	sp|P20042|Eukaryotic translation initiation factor 2 subunit 2	DASDDLDDLNFFNQK	140	N74	3	879.379	2635.14	84.938
102	sp|P20290|Transcription factor BTF3	APLATGEDDDDEVPDLVENFDEASKNEAN	141	N196	3	1040.78	3119.34	141.1
103	sp|P26038|Moesin	TAMSTPHVAEPAENEQDEQDENGAEASADLR	142	N478	3	1110.47	3328.41	126.5
104	sp|P30050|60S ribosomal protein L12	HPHDIIDDINSGAVECPAS	143	N156	2	683.306	1364.61	97.797
105	sp|P30825|High affinity cationic amino acid transporter 1	LCLNNDTK	144	N234	4	489.732	1954.93	60.104
106	sp|P34932|Heat shock 70 kDa protein 4	NAEQNGPVDGQGDNPGPQAAEQGTDTAVPSDSDK	145	N799	2	842.616	1683.23	158.11
107	sp|P40189|Interleukin-6 receptor subunit beta	LTVNLTNDR	146	N390	3	523.777	1568.33	142.32
108	sp|P46821|Microtubule-associated protein 1B;MAP1 light chain LC1	LLDDISNGYDDSEDGGHTLGDPSYSYETTEK	147	N1989	2	1132.15	2262.29	130.27
109	sp|P49792|E3 SUMO-protein ligase RanBP2;Putative peptidyl-prolyl cis-trans isomerase	LPPTFFCGVCSDTDEDNGNGEDFQSELQK	148	N2749	2	1103.13	2204.25	117.09
110	sp|P53634|Dipeptidyl peptidase 1;Dipeptidyl peptidase 1 exclusion domain chain;Dipeptidyl peptidase 1 heavy chain;Dipeptidyl peptidase 1 light chain	DVNCSVMGPQEK	149	N53	2	690.792	1379.58	136.48
111	sp|P56199|Integrin alpha-1	LDLPVNTSIPNVTEVK	150	N100	3	870.475	2608.42	61.181
112	sp|P61978-2|Heterogeneous nuclear ribonucleoprotein K	METEQPEETFPNTETNGEFGK	151	N12	2	825.344	1648.69	65.775
113	sp|P62899|60S ribosomal protein L31	NLQTVNVDEN	152	N116	2	573.767	1145.53	98.573
114	sp|P63261|Actin, cytoplasmic 2;Actin, cytoplasmic 2, N-terminally processed	EEEIAALVIDNGSGMCK	153	N12	3	939.927	2816.78	94.122
115	sp|P78310|Coxsackievirus and adenovirus receptor	SGDASINVTNLQLSDIGTYQCK	154	N106	3	795.713	2384.14	144.1
116	sp|Q02952|A-kinase anchor protein 12	EDEKGDDVDDPENQNSALADTDASGGLTK	155	N1709	3	1003.1	3006.29	171.32
117	sp|Q07954|Prolow-density lipoprotein receptor-related protein 1;Low-density lipoprotein receptor-related protein 1 85 kDa subunit;Low-density lipoprotein receptor-related protein 1 515 kDa subunit;Low-density lipoprotein receptor-related protein 1 intracellular domain	LTSCATNASICGDEAR	156	N3788	2	576.251	1150.5	114.59
118	sp|Q08380|Galectin-3-binding protein	AAIPSALDTNSSK	157	N551	3	638.325	1911.97	48.376
		ALGFENATQALGR	158	N69	2	450.233	898.467	60.307
		DAGVVCTNETR	159	N125	2	611.772	1221.54	47.082
		TVIRPFYLTNSSGVD	160	N580	3	835.425	2503.28	139.89
119	sp|Q11201|CMP-N-acetylneuraminate-beta-galactosamide-alpha-2,3-sialyltransferase 1	ELGDNVSMILVPFK	161	N201	3	731.022	2190.07	56.817
		TGVHDADFESNVTATLASINK	162	N323	3	878.057	2631.17	58.671
120	sp|Q12913|Receptor-type tyrosine-protein phosphatase eta	IHVAGETDSSNLNVSEPR	163	N413	3	642.645	1924.93	125.45
121	sp|Q13247|Serine/arginine-rich splicing factor 6;Serine/arginine-rich splicing factor 4	NGYGFVEFEDSRDADDAVYELNGK	164	N35	3	904.724	2711.17	106.28
122	sp|Q13308-6|Inactive tyrosine-protein kinase 7	DDAGNYTCIASNGPQGQIR	165	N575	3	680.297	2037.89	61.641
123	sp|Q13641|Trophoblast glycoprotein	CVNRNLTEVPTDLPAYVR	166	N79	2	706.693	1411.39	170.06
124	sp|Q14108|Lysosome membrane protein 2	ANIQFGDNGTTISAVSNK	167	N105	3	919.45	2755.35	69.704
125	sp|Q14247-2|Src substrate cortactin	ASAGHAVSIAQDDAGADDWETDPDFVNDVSEK	168	N30	3	1111.81	3332.44	191.96
126	sp|Q147X3|N-alpha-acetyltransferase 30	NGLAEGTEQEEEEEDEQVR	169	N167	3	1096.46	3286.38	141.58
127	sp|Q15651|High mobility group nucleosome-binding domain-containing protein 3	EGTAPSENGETKAEEAQKTESVDNEGE	170	N80	2	946.407	1890.81	45.864
128	sp|Q16706|Alpha-mannosidase 2	DSVINLSESVEDGPK	171	N78	2	795.381	1588.76	90.614
129	sp|Q8N8Z6|Discoidin, CUB and LCCL domain-containing protein 1	ELLLNTSEVTVR	172	N124	2	687.877	1373.75	86.288
130	sp|Q5TA04|	MATNIPCEVVAFSDR	173	N4	2	884.898	1767.8	77.732
131	sp|Q9HD45|Transmembrane 9 superfamily member 3	IVDVNLTSEGK	174	N174	2	588.311	1174.62	160.53
132	sp|Q9Y490|Talin-1	ADAEGESDLENSR	175	N852	2	697.289	1392.58	163.99
133	sp|Q9NPF5|DNA methyltransferase 1-associated protein 1	EQLERLYNR	176	N235	2	611.315	1220.63	132.74
134	sp|Q5ZPR3|CD276 antigen	DQGSAYANR	177	N91	2	491.715	981.43	71.548
		VVLGANGTYSCLVR	178	N215	3	755.39	2263.17	109.44
135	sp|Q6NZY4|Zinc finger CCHC domain-containing protein 8	FKDDDGDEEDENGVGDAELR	179	N42	2	742.637	1483.27	120.06
		LDPTVLDAGELANR	180	N2075	2	742.883	1483.77	65.085
		TQDEILFSNSTR	181	N118	2	706.339	1410.68	107.99
136	sp|Q8NBN3|Transmembrane protein 87A	LFQNCSELFK	182	N127	2	643.808	1285.62	59.282
		NGVIQHTGAAAEEFNDDTD	183	N646	2	1002.92	2003.85	63.944
		LLDEEEATDNLR	184	N471	3	767.349	2299.05	67.997
137	sp|Q93008|Probable ubiquitin carboxyl-terminal hydrolase FAF-X	NGILAIEGTGSDVDDDMSGDEKQDNESNVDPR	185	N1583	2	1137.15	2272.31	107.99
		PTPDYLMQLMNDK	186	N23	2	791.86	1581.72	90.367
		CQGESTQLQNEIQK	187	N572	3	833.859	2498.58	73.927
		NSQEDSEDSEDKDVK	188	N23	2	575.903	1149.81	102.07
		IGTFCSNGTVSR	189	N180	2	879.909	1757.82	145.29
		ASVSFLNFNLSNCER	190	N270	2	764.862	1527.72	115.38
		INYTDPFSNQTVK	191	N216	2	1118.58	2235.17	53.565
		QVALQTFGNQTTIIPAGGAGYK	192	N259	2	726.338	1450.68	66.498
		ELDLTCNITTDR	193	N300	3	797.907	2390.72	100.94
		VIQTSAANFSLNNSK	194	N185	2	784.02	1566.04	116.29
		MMQVIEEYIEDYNQINTAK	195	N2549	3	708.351	2122.05	51.487
		VTPACNTSLPAQR	196	N69	2	957.445	1912.89	72.315
		ITADLLSNGIDVYPQKEFDEDSEDR	197	N468	2	1065.99	2129.98	46.494
		DSNGAILVYDITDEDSFQK	198	N93	3	919.874	2756.62	169.49
		TAENATSGETLEENEAGD	199	N380	2	999.922	1997.84	77.324
138	sp|REV__E9PHX9|-	EDDVSYENEPKGELMEEK	200	N8	2	714.64	1427.28	171.26
		NGSLAYGEEDSEPQSLDSER	201	N3331	2	1092.46	2182.93	119.54
139	sp|A2AJT9|Uncharacterized protein CXorf23	NSLENVYMYKPHRGYSPGR	202	N89	2	1143.04	2284.08	99.508
140	sp|G3V2F7|Transmembrane protein 189	AGAENWPGQQLELDEDEASCCR	203	N6	3	860.02	2577.06	123.19
141	sp|A6NEL0|Non-histone chromosomal protein HMG-14	EDLPAENGETKTEESPASDEAGEK	204	N94	3	845.368	2533.1	52.254
		MLQNQDTMEILSNSTSK	205	N4	3	783.002	2346.01	102.4
142	sp|P11166|Solute carrier family 2, facilitated glucose transporter member 1	VIEEFYNQTWVHR	206	N45	3	574.614	1720.84	198.56
143	sp|P51858-3|Solute carrier family 2, facilitated glucose transporter member 1	NSTPSEPGSGRGPPQEEEEEEDEEEEATKEDAEAPGIR	207	N214	4	1028.94	4111.77	64.209
144	sp|P09211|Glutathione S-transferase P	DQQEAALVDMVNDGVEDLR	208	N94	3	706.66	2116.98	179.81
145	sp|Q9NP61|ADP-ribosylation factor GTPase-activating protein 3	CMQVGGNASASSFFHQHGCSTNDTNAK	209	N84	4	734.287	2933.15	105.77
146	sp|P62633|Cellular nucleic acid-binding protein	DCDLQEDACYNCGR	210	N76	3	592.88	1775.64	44.632
147	sp|P10809|60 kDa heat shock protein, mitochondrial	LVQDVANNTNEEAGDGTTTATVLAR	211	N103	3	854.744	2561.23	49.559
148	sp|Q02413|Desmoglein-1	TSGMPEICQEYSGTLRRNSMR	212	N679	3	830.711	2489.13	69.716
149	sp|P06454|Prothymosin alpha;Thymosin alpha-1	EVVEEAENGR	213	N29	2	566.759	1131.52	234.9
150	sp|P10646|Tissue factor pathway inhibitor	YFYNNQTK	214	N144	2	539.746	1077.49	141.37
151	sp|P22090|40S ribosomal protein S4, Y isoform 1;40S ribosomal protein S4, X isoform;40S ribosomal protein S4, Y isoform 2	DANGNSFATR	215	N214	2	901.325	1800.65	99.392
152	sp|P08962|CD63 antigen	CCGAANYTDWEK	216	N150	3	634.617	1900.85	168.98
153	sp|Q16563|Synaptophysin-like protein 1	LNEASFQPPPGVNICDVNWK	217	N96	3	762.7	2285.1	149.95
154	sp|Q13510-2|Acid ceramidase;Acid ceramidase subunit alpha;Acid ceramidase subunit beta	ILAPAYFILGGNQSGEGCVITR	218	N302	2	987.93	1973.86	150.05
155	sp|Q9Y520-7|Protein PRRC2C	NGQESGLEIGTDTIQFGAPASNGNENEVVPVLSEK	219	N2043	3	1077.11	3228.32	111.57
156	sp|F8WA38|Receptor-type tyrosine-protein phosphatase mu	AVSSFDPEIDLSNQSGR	220	N534	3	804.987	2411.96	110.97
157	sp|P16278|Beta-galactosidase	NNVITLNITGK	221	N464	2	705.82	1409.64	133.4
158	sp|P05362|Intercellular adhesion molecule 1	LNPTVTYGNDSFSAK	222	N267	3	543.56	1627.68	80.664
159	sp|Q9NTJ3|Structural maintenance of chromosomes protein 4;Structural maintenance of chromosomes protein	MESQLQNDSKKAMQIQEQK	223	N785	3	1185.53	3553.6	179.1
160	sp|E9PQ95|-	MDFSFSFMQGIMGNTIQQPPQLIDS	224	N14	3	636.65	1906.95	101.2
161	sp|Q76FK4|Nucleolar protein 8	FLETDSEEEQEEVNEKK	225	N898	2	650.838	1299.68	113.88
162	sp|Q8NHP8|Putative phospholipase B-like 2;Putative phospholipase B-like 2 32 kDa form;Putative phospholipase B-like 2 45 kDa form	HPDAVAWANLTNAIR	226	N88	3	847.702	2540.1	165.17
163	sp|F8WCY5|Reticulocalbin-2	VIDFDENTALDDAEEESFR	227	N136	3	695.311	2082.93	154.46
164	sp|G3V314|-	MLFALNIMNSQEGGPSSQR	228	N6	3	837.679	2510.04	134.25
165	sp|Q68DA7|Formin-1	DIHAALQPMEGMASNQQK	229	N863	2	944.89	1887.78	183.24
166	sp|Q8NEZ4-3|Histone-lysine N-methyltransferase MLL3	DIDDNSNGTYEK	230	N178	3	1171.19	3510.57	164.97
167	sp|Q99547|M-phase phosphoprotein 6	DHANYEEDENGDITPIK	231	N137	4	799.851	3195.4	132.31
168	sp|J3KNX9|Unconventional myosin-XVIIIa	AAEINGEVDDDDAGGEWR	232	N1359	3	867.359	2599.08	51.03
169	sp|P52948|Nuclear pore complex protein Nup98-Nup96;Nuclear pore complex protein Nup98;Nuclear pore complex protein Nup96	DSENLASPSEYPENGER	233	N630	3	604.908	1811.72	157.56
170	sp|O00231-2|26S proteasome non-ATPase regulatory subunit 11	DIQENDEEAVQVK	234	N38	3	722.025	2163.07	73.036
171	sp|K7ELL7|Glucosidase 2 subunit beta	VNDGVCDCCDGTDEYNSGVICENTCK	235	N114	2	1013.48	2024.96	54.764
172	sp|O00299|Chloride intracellular channel protein 1	VLDNYLTSPLPEEVDETSAEDEGVSQR	236	N142	3	620.293	1857.88	163.45
		CVEESGSAHCVCPMLTCPEANATK	237	N932	2	455.717	909.434	155.06
173	sp|O75449|Katanin p60 ATPase-containing subunit A1	NLSKEEMHMPTTMEDFEMALK	238	N447	3	880.057	2637.17	244.27
174	sp|O94925|Glutaminase kidney isoform, mitochondrial	DGPGETDAFGNSEGK	239	N117	2	574.777	1147.55	114.5
		NPFTAAYDISVLPR	240	N222	2	672.776	1343.55	145.46
		ESDTKNEVNGTSEDIKSEGDTQSN	241	N414	3	691.98	2072.94	235.24
175	sp|P07602-2|Proactivator polypeptide;Saposin-A;Saposin-B-Val;Saposin-B;Saposin-C;Saposin-D	NLEKNSTKQEILAALEK	242	N428	2	730.301	1458.6	216.75
		YSVANDTGFVDIPKQEK	243	N221	3	1127.78	3380.33	192.5
176	sp|P15328|Folate receptor alpha	GWNWTSGFNK	244	N161	2	958.944	1915.89	116.78
		ASFERMDHLRQLQNIIQATSR	245	N274	3	730.333	2188	68.44
		NYAGEEEEEGSGSSEGFDPPATDR	246	N191	2	703.33	1404.66	164.48
		THSINNIIEYNECGTFFSEK	247	N240	2	582.718	1163.44	75.564
		LDHVNIVHYNGCWDGFDYDPETSDDSLESSDYDPENSK	248	N319	2	539.746	1077.49	111.46
177	sp|P22314|Ubiquitin-like modifier-activating enzyme 1	IYDDDFFQNLDGVANALDNVDAR	249	N573	2	527.725	1053.45	140.89
		NGSEADIDEGLYSR	250	N44	2	1034.47	2066.93	187.97
178	sp|P35579|Myosin-9	IAQLEEELEEEQGNTELINDR	251	N1749	3	908.803	2723.41	311.23
		HDSEQDNSDNNTIFVQGLGENVTIESVADYFK	252	N295	3	522.272	1563.82	143.24
179	sp|P61565|HERV-K_12q14.1 provirus ancestral Env polyprotein;Surface protein;Transmembrane protein;HERV-K_12q14.1 provirus Rec protein	MNKMVTSEQMK	253	N28	2	886.919	1771.84	157.35
		TAFDDAIAELDTLNEDSYK	254	N212	2	738.282	1474.56	169.02
180	sp|Q01658|Protein Dr1	ASSSGNDDDLTIPR	255	N7	2	644.349	1286.7	110.08
		TIFQQISNNR	256	N883	3	762.7	2285.1	205.27
		DGLLQDEEEEEEEAAESEEDDNLSSMLHQRAEIPWR	257	N985	2	587.754	1173.51	74.987
		NDHDDDEDEEVISK	258	N342	3	581.28	1740.84	118.47
		EFQLDLDEIENDNGTVR	259	N1495	3	511.929	1532.79	49.773
		MNNNWNVCFFLFCPSITR	260	N2	2	911.895	1821.79	72.425
		NDLDDPER	261	N276	2	571.26	1140.52	68.269
		ESEDSTDFNDK	262	N59	2	791.873	1581.75	65.105
		MADLPYQNYFGGK	263	N135	2	892.915	1783.83	134.49
		LIRGPGENGDDS	264	N345	2	618.299	1234.6	144.1
181	sp|Q96B36-3|Proline-rich AKT1 substrate 1	SSDEENGPPSSPDLDR	265	N227	3	619.234	1854.7	149.22
		VSTNGSDDPEDAGAGENR	266	N219	2	781.91	1561.82	54.225
		DITDLINNTFIR	267	N162	2	823.901	1645.8	56.407
		HVYNNLTEEQK	268	N73	3	779.735	2336.21	123.43
		DDNGNILDPDETSTIALFK	269	N169	3	1131.83	3392.48	116.51
		SSSIGSMESLEQPGQATYESHLLPIDQNMYPNQR	270	N180	3	1201.57	3601.71	278.72
		NEDEEEEEEEKDEAEDLLGR	271	N434	2	911.926	1821.85	251.41
182	sp|Q7Z7H8-2|39S ribosomal protein L10, mitochondrial	DSVMSANGKPDPDTVPDS	272	N260	2	594.335	1186.67	222.39
183	sp|Q8N5V2|Ephexin-1	RQQDAEIEDNTNGSPASEDTPEEEEEEEEEEEPASPPERK	273	N204	2	581.747	1161.49	89.846
184	sp|Q8TBZ0-2|-	MQTLQNVSMPTENQEENLSMEK	274	N76	2	807.886	1613.77	31.775
185	sp|Q6YHK3|CD109 antigen	TQDEILFSNSTR	275	N118	2	1166.5	2331	188.41
186	sp|REV__Q9NY99|-	TRNGQHSGGVCVVDK	276	N471	3	767.019	2298.06	123.59
		LDYFDRDYYDYDFIYGNSFITEVDKK	277	N129	2	807.886	1613.77	87.388
